# Supplementary material
Source: PubMed Central journal article supplement (PMC6338081)
Supplement: NIHMS1517296-supplement-007835_-_Supplemental_Material.pdf [file NIHMS1517296-supplement-007835_-_Supplemental_Material.pdf]

## SUPPLEMENTAL MATERIAL

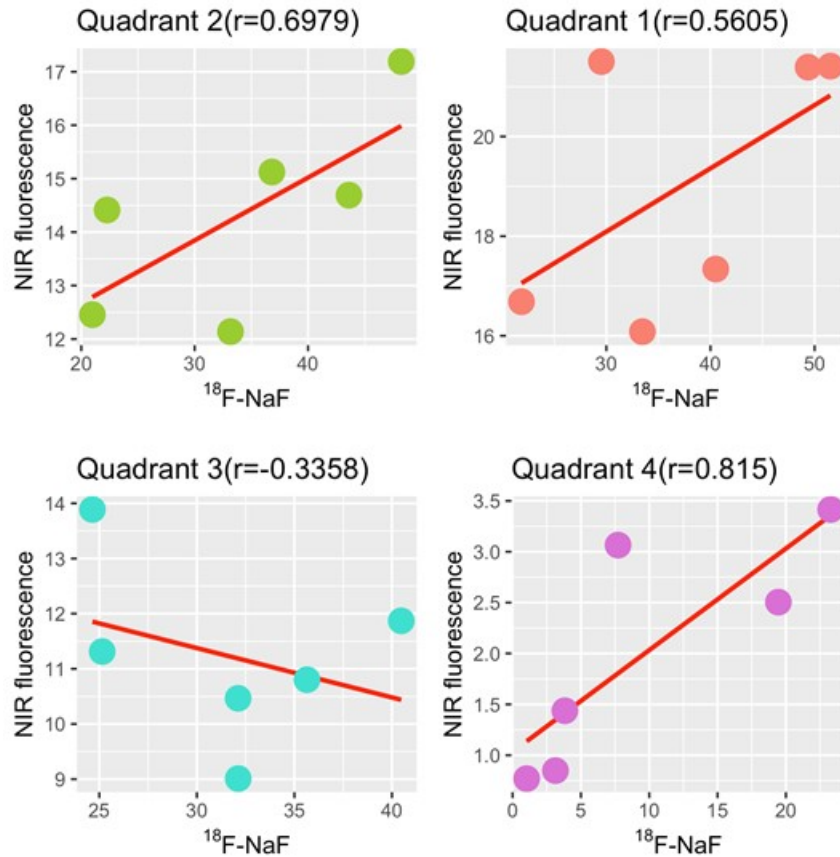

**Supplemental Figure 1.** Linear correlations within quadrants obtained from sections (Pearson R for Q1=0.5605, Q2=0.6979, Q3=-0.3358 and Q4=0.8150). We found that variance in the model is attributed to random errors from the four image quadrants (87.58% of total variance, Supplementary Table 1). Therefore, we calculated Pearson's R within the four quadrants, respectively (Fig. 4F). Quadrant 3 (Q3) shows a negative correlation, while the other quadrants show positive correlations between the signals. We speculated that histological section 6 (S6) is an outlier causing a negative correlation (Fig. 4F). We conducted Jackknife resampling and calculated Pearson's R to test if S6 is an outlier in Q3 (Supplementary Table 2). The resampled correlation coefficients without S6 ( $r = -0.3798 \sim 0.8611$ ) are much higher than ones with S6 ( $r = -0.6819 \sim -0.3141$ ), indicating that S6 is an influential outlier causing a negative correlation in Q3. These findings demonstrate the presence of microcalcifications in areas identified as PET-positive and CT-negative during *ex vivo* PET/CT imaging of explanted specimens.

**Supplemental Table 1. Variance component analysis results.** We conducted variance component analysis (VCA) for a mixed model for a correlational analysis between NIRF signal and <sup>18</sup>F-fluoride autoradiography signal. CV: Coefficient of variation.

|                       | Variance component | Percent to total (%) | CV (%)  |
|-----------------------|--------------------|----------------------|---------|
| Total                 | 23.3549            | 100                  | 41.449  |
| Quadrant              | 20.4531            | 87.5753              | 38.7886 |
| Histological Sections | 1.5833             | 6.7792               | 10.792  |
| Error                 | 1.3185             | 5.6455               | 9.8484  |

**Supplemental Table 2. Pearson's R in quadrants with Jackknife resampling.** We conducted Jackknife resampling for all six sections with or without section 6 (S6) in quadrant 3 and calculated Pearson's r for signals between NIRF and <sup>18</sup>F-fluoride. S6: Histological section 6.

| Quadrant | Excluded section | Pearson's r with S6 | Pearson's r without S6 |
|----------|------------------|---------------------|------------------------|
| 3        | 1                | -0.4208             | 0.3239                 |
| 3        | 2                | -0.6819             | -0.3798                |
| 3        | 3                | -0.3786             | 0.8611                 |
| 3        | 4                | -0.3141             | 0.2372                 |
| 3        | 5                | -0.3372             | 0.2348                 |
